# Supplementary material for: Design and validation of an open-source modular Microplate Photoirradiation System for high-throughput photobiology experiments
Source: PLOS journal article supplement (doi:10.1371/journal.pone.0203597), 2018-10-05
Supplement: S3 (10.1371/journal.pone.0203597.s003) [file journal.pone.0203597.s003]

### S3. Light System Comparison Table

Comparison of our MPS with recent open-source microplate-based systems (green), as well as the commercially available LUMUS system (purple). Novel features contained in the MPS in comparison to other open-source designs are highlighted in blue.

| Specification                                               | MPS                                                                                                                                                              | Light Plate Apparatus                                                                                                                                                                                               | LED Illuminator                                                  | COMET                                                            | AXION LUMUS (commercial)                                 |
|-------------------------------------------------------------|------------------------------------------------------------------------------------------------------------------------------------------------------------------|---------------------------------------------------------------------------------------------------------------------------------------------------------------------------------------------------------------------|------------------------------------------------------------------|------------------------------------------------------------------|----------------------------------------------------------|
| Publication                                                 | N/A                                                                                                                                                              | [1] Gerhardt et al. 2016                                                                                                                                                                                            | [2] Hannanta-anan & Chow. 20162                                  | [3] Reis et al. 20163                                            | [4] Clements et al. 2015                                 |
| <b>Design Features</b>                                      |                                                                                                                                                                  |                                                                                                                                                                                                                     |                                                                  |                                                                  |                                                          |
| Format                                                      | both 24-well and 96-well                                                                                                                                         | 24-well                                                                                                                                                                                                             | 24-well                                                          | 96-well                                                          | 24 and 48-well culture plate (proprietary)               |
| Throughput (Maximum Independent Light Conditions Per Plate) | 24/96                                                                                                                                                            | 24                                                                                                                                                                                                                  | 6                                                                | 8                                                                | 24/48                                                    |
| LED Type                                                    | surface mount                                                                                                                                                    | through-hole                                                                                                                                                                                                        | through-hole                                                     | through-hole                                                     | surface mount                                            |
| LEDs per well                                               | 24-well=4; 96-well=1                                                                                                                                             | 2                                                                                                                                                                                                                   | 2                                                                | 1                                                                | 4                                                        |
| Customizable LED range                                      | customizable                                                                                                                                                     | customizable                                                                                                                                                                                                        | customizable                                                     | customizable                                                     | fixed: (475, 530, 612, 655 nm)                           |
| <b>Control Features</b>                                     |                                                                                                                                                                  |                                                                                                                                                                                                                     |                                                                  |                                                                  |                                                          |
| Controller                                                  | Teensy 2.0 (Atmega32U4)                                                                                                                                          | ATMega328a                                                                                                                                                                                                          | Arduino (Model Unknown)                                          | Arduino Mega                                                     | dual-core CPU with FPGA co-processor                     |
| LED Driver                                                  | TLC59401                                                                                                                                                         | TLC5940                                                                                                                                                                                                             | PWM + potentiometer                                              | CL25N3-G (fixed current 25 mA)                                   | Unknown                                                  |
| Intensity Control                                           | 12-bit PWM, 6-bit Current Control                                                                                                                                | 12-bit PWM, 6-bit Current Control                                                                                                                                                                                   | Analog/PWM                                                       | PWM                                                              | digital (driver unknown)                                 |
| Waveform Amplitude Modulation                               | NO                                                                                                                                                               | YES                                                                                                                                                                                                                 | NO                                                               | NO                                                               | YES                                                      |
| Individual Well Control                                     | YES                                                                                                                                                              | YES                                                                                                                                                                                                                 | NO                                                               | NO                                                               | YES                                                      |
| Firmware Source Code Documentation                          | open-source                                                                                                                                                      | open-source                                                                                                                                                                                                         | open-source                                                      | open-source                                                      | closed-source                                            |
| Graphical User Interface                                    | Yes; web browser-based                                                                                                                                           | Yes; web browser-based (Iris)                                                                                                                                                                                       | No; Arduino IDE (Serial Interface)                               | No; Arduino IDE (Serial Interface)                               | Yes; PC software (AxIS)                                  |
| Program Transfer Method/Storage                             | Wireless Web App (USB serial optional)                                                                                                                           | SD card                                                                                                                                                                                                             | None reported                                                    | None (Firmware must be re-programmed for each experiment)        | USB to device memory                                     |
| Environmental Control                                       | Yes; can be placed inside incubator                                                                                                                              | Yes; can be placed inside incubator                                                                                                                                                                                 | Yes; can be placed inside incubator                              | Yes; can be placed inside incubator                              | Yes; system equipped with its own controlled environment |
| Remote/Wireless control                                     | YES; WiFi                                                                                                                                                        | NO                                                                                                                                                                                                                  | NO                                                               | NO                                                               | NO                                                       |
| <b>Hardware Fabrication</b>                                 |                                                                                                                                                                  |                                                                                                                                                                                                                     |                                                                  |                                                                  |                                                          |
| Stage/Platform setup                                        | Modular Laser-cut acrylic stage and replaceable isolation plate with aluminum stand-offs                                                                         | 3D-printed ABS                                                                                                                                                                                                      | Laser-cut acrylic                                                | laser-cut acrylic with water-jet cut copper block as a heat-sink | N/A                                                      |
| Assembly Cost                                               | \$200-250                                                                                                                                                        | \$150-400                                                                                                                                                                                                           | not reported                                                     | not reported                                                     | \$26,000                                                 |
| Hardware Design and Fabrication Documentation               | Open                                                                                                                                                             | Open                                                                                                                                                                                                                | Open                                                             | Open                                                             | Proprietary                                              |
| <b>Calibration</b>                                          |                                                                                                                                                                  |                                                                                                                                                                                                                     |                                                                  |                                                                  |                                                          |
| LED Calibration                                             | YES                                                                                                                                                              | YES                                                                                                                                                                                                                 | Limited                                                          | not reported                                                     | unknown                                                  |
| Calibration Memory                                          | YES; EEPROM                                                                                                                                                      | SD card                                                                                                                                                                                                             | NO                                                               | NO                                                               | unknown                                                  |
| Automated Measurement                                       | Custom GUI for automatically measuring irradiance and fitting to driver output for each LED channel                                                              | MATLAB image analysis to calibrate relative brightness to known irradiance. Manual calibration with spectrometer of 5 LEDs to calibrate image brightness to true values                                             | Manual - Analog potentiometer adjustment and LED quality control | N/A                                                              | unknown                                                  |
| Device-level Irradiance Control                             | Yes - Custom GUI outputs quadratic calibration parameters for each LED to device for automated calculation of settings for any desired irradiance                | No - Single-value calibration of each LED for one experiment - must repeat calibration procedure for new irradiance settings                                                                                        | N/A                                                              | N/A                                                              | unknown                                                  |
| Accessory Instruments                                       | ThorLabs S121C Photodiode Power Sensor (400-1100 nm) connected to a Thorlabs PM100USB Power Meter Interface with custom laser-cut well adaptors (24 and 96-well) | Pixel analysis in with a camera in an enclosed gel-imager (FluorChem FC2, Alpha Innotech) + probe spectrometer (StellarNet Inc, photodetector: EPP2000 UVN-SR-25LT-16, probe: F600-UV-VIS-SR, software: SpectraWiz) | ThorLabs PM100D power meter with S120 sensor                     | NO                                                               | unknown                                                  |
| Calibration Documentation                                   | Yes                                                                                                                                                              | Yes                                                                                                                                                                                                                 | NO                                                               | NO                                                               | unknown                                                  |

| Specification                                               | MPS                                                                                                                                                              | Light Plate Apparatus                                                                                                                                                                                               | LED Illuminator                                                  | COMET                                                            | AXION LUMUS (commercial)                                 |
|-------------------------------------------------------------|------------------------------------------------------------------------------------------------------------------------------------------------------------------|---------------------------------------------------------------------------------------------------------------------------------------------------------------------------------------------------------------------|------------------------------------------------------------------|------------------------------------------------------------------|----------------------------------------------------------|
| Publication                                                 | N/A                                                                                                                                                              | [1] Gerhardt et al. 2016                                                                                                                                                                                            | [2] Hannanta-anan & Chow. 20162                                  | [3] Reis et al. 20163                                            | [4] Clements et al. 2015                                 |
| Design Features                                             |                                                                                                                                                                  |                                                                                                                                                                                                                     |                                                                  |                                                                  |                                                          |
| Format                                                      | both 24-well and 96-well                                                                                                                                         | 24-well                                                                                                                                                                                                             | 24-well                                                          | 96-well                                                          | 24 and 48-well culture plate (proprietary)               |
| Throughput (Maximum Independent Light Conditions Per Plate) | 24/96                                                                                                                                                            | 24                                                                                                                                                                                                                  | 6                                                                | 8                                                                | 24/48                                                    |
| LED Type                                                    | surface mount                                                                                                                                                    | through-hole                                                                                                                                                                                                        | through-hole                                                     | through-hole                                                     | surface mount                                            |
| LEDs per well                                               | 24-well=4; 96-well=1                                                                                                                                             | 2                                                                                                                                                                                                                   | 2                                                                | 1                                                                | 4                                                        |
| Customizable LED range                                      | customizable                                                                                                                                                     | customizable                                                                                                                                                                                                        | customizable                                                     | customizable                                                     | fixed: (475, 530, 612, 655 nm)                           |
| Control Features                                            |                                                                                                                                                                  |                                                                                                                                                                                                                     |                                                                  |                                                                  |                                                          |
| Controller                                                  | Teensy 2.0 (Atmega32U4)                                                                                                                                          | ATMega328a                                                                                                                                                                                                          | Arduino (Model Unknown)                                          | Arduino Mega                                                     | dual-core CPU with FPGA co-processor                     |
| LED Driver                                                  | TLC59401                                                                                                                                                         | TLC5940                                                                                                                                                                                                             | PWM + potentiometer                                              | CL25N3-G (fixed current 25 mA)                                   | Unknown                                                  |
| Intensity Control                                           | 12-bit PWM, 6-bit Current Control                                                                                                                                | 12-bit PWM, 6-bit Current Control                                                                                                                                                                                   | Analog/PWM                                                       | PWM                                                              | digital (driver unknown)                                 |
| Waveform Amplitude Modulation                               | NO                                                                                                                                                               | YES                                                                                                                                                                                                                 | NO                                                               | NO                                                               | YES                                                      |
| Individual Well Control                                     | YES                                                                                                                                                              | YES                                                                                                                                                                                                                 | NO                                                               | NO                                                               | YES                                                      |
| Firmware Source Code Documentation                          | open-source                                                                                                                                                      | open-source                                                                                                                                                                                                         | open-source                                                      | open-source                                                      | closed-source                                            |
| Graphical User Interface                                    | Yes; web browser-based                                                                                                                                           | Yes; web browser-based (Iris)                                                                                                                                                                                       | No; Arduino IDE (Serial Interface)                               | No; Arduino IDE (Serial Interface)                               | Yes; PC software (AxIS)                                  |
| Program Transfer Method/Storage                             | Wireless Web App (USB serial optional)                                                                                                                           | SD card                                                                                                                                                                                                             | None reported                                                    | None (Firmware must be re-programmed for each experiment)        | USB to device memory                                     |
| Environmental Control                                       | Yes; can be placed inside incubator                                                                                                                              | Yes; can be placed inside incubator                                                                                                                                                                                 | Yes; can be placed inside incubator                              | Yes; can be placed inside incubator                              | Yes; system equipped with its own controlled environment |
| Remote/Wireless control                                     | YES; WiFi                                                                                                                                                        | NO                                                                                                                                                                                                                  | NO                                                               | NO                                                               | NO                                                       |
| Hardware Fabrication                                        |                                                                                                                                                                  |                                                                                                                                                                                                                     |                                                                  |                                                                  |                                                          |
| Stage/Platform setup                                        | Modular Laser-cut acrylic stage and replaceable isolation plate with aluminum stand-offs                                                                         | 3D-printed ABS                                                                                                                                                                                                      | Laser-cut acrylic                                                | laser-cut acrylic with water-jet cut copper block as a heat-sink | N/A                                                      |
| Assembly Cost                                               | \$200-250                                                                                                                                                        | \$150-400                                                                                                                                                                                                           | not reported                                                     | not reported                                                     | \$26,000                                                 |
| Hardware Design and Fabrication Documentation               | Open                                                                                                                                                             | Open                                                                                                                                                                                                                | Open                                                             | Open                                                             | Proprietary                                              |
| Calibration                                                 |                                                                                                                                                                  |                                                                                                                                                                                                                     |                                                                  |                                                                  |                                                          |
| LED Calibration                                             | YES                                                                                                                                                              | YES                                                                                                                                                                                                                 | Limited                                                          | not reported                                                     | unknown                                                  |
| Calibration Memory                                          | YES; EEPROM                                                                                                                                                      | SD card                                                                                                                                                                                                             | NO                                                               | NO                                                               | unknown                                                  |
| Automated Measurement                                       | Custom GUI for automatically measuring irradiance and fitting to driver output for each LED channel                                                              | MATLAB image analysis to calibrate relative brightness to known irradiance. Manual calibration with spectrometer of 5 LEDs to calibrate image brightness to true values                                             | Manual - Analog potentiometer adjustment and LED quality control | N/A                                                              | unknown                                                  |
| Device-level Irradiance Control                             | Yes - Custom GUI outputs quadratic calibration parameters for each LED to device for automated calculation of settings for any desired irradiance                | No- Single-value calibration of each LED for one experiment - must repeat calibration procedure for new irradiance settings                                                                                         | N/A                                                              | N/A                                                              | unknown                                                  |
| Accessory Instruments                                       | ThorLabs S121C Photodiode Power Sensor (400-1100 nm) connected to a Thorlabs PM100USB Power Meter Interface with custom laser-cut well adaptors (24 and 96-well) | Pixel analysis in with a camera in an enclosed gel-imager (FluorChem FC2, Alpha Innotech) + probe spectrometer (StellarNet Inc, photodetector: EPP2000 UVN-SR-25LT-16, probe: F600-UV-VIS-SR, software: SpectraWiz) | ThorLabs PM100D power meter with S120 sensor                     | NO                                                               | unknown                                                  |
| Calibration Documentation                                   | Yes                                                                                                                                                              | Yes                                                                                                                                                                                                                 | NO                                                               | NO                                                               | unknown                                                  |

## References

1. Gerhardt, K. P., Olson, E. J., Castillo-Hair, S. M., Hartsough, L. A., Landry, B. P., Ekness, F., et al. An open-hardware platform for optogenetics and photobiology. Scientific Reports .
2. Hannanta-anan P, Chow B. Optogenetic Control of Calcium Oscillation Waveform Defines NFAT as an Integrator of Calcium Load. Cell Systems. 2016;2(4):283–8.
3. Reis, S. A., Ghosh, B., Hendricks, A. J., Szantai-Kis, M. D., Törk, L., Ross, K. N., et al. Light-controlled modulation of gene expression by chemical optoepigenetic probes. Nature Chemical Biology. 2016, 12 (5), 317-323.
4. Clements, I.P, et al. Optogenetic stimulation of multiwell MEA plates for neural and cardiac applications. Proc. of SPIE, 2016, Vol. 9690 96902C-1.
